# Supplementary material for: Cowpea Growth and Nitrogen Fixation Performance under Different Mulch Treatments
Source: MDPI journal article supplement (doi:10.3390/agriculture12081144), 2022-08-02
Supplement: s1 [file s1]

## Supplementary Tables

**Table S1.** Effect of mulch type and mulch rate on selected parameters at Syferkuil.

| Syferkuil 2017 |          |             |               |              |               |             |
|----------------|----------|-------------|---------------|--------------|---------------|-------------|
| Mulch type     | Moisture | Chlorophyll | Stem Diameter | Plant Height | Shoot Biomass | Grain Yield |
|                | (%)      |             | (mm)          | (cm)         | (kg/ha)       | (kg/ha)     |
| C              | 4.47a    | 22.85a      | 6.75a         | 23.98b       | 1037.78a      | 349.43b     |
| MLT            | 6.49a    | 29.11a      | 7.79a         | 26.21a       | 1093.92a      | 277.67c     |
| MST            | 6.76a    | 28.75a      | 8.14a         | 27.43a       | 1088.92a      | 410.17a     |
| VK             | 6.39a    | 28.35a      | 8.02a         | 27.46a       | 1143.61a      | 397.50a     |
|                | ns       | ns          | ns            | *            | ns            | **          |
| Mulch Rate     |          |             |               |              |               |             |
| 0              | 4.47b    | 22.85c      | 6.75a         | 23.98a       | 1037.78b      | 349.43ab    |
| 3              | 6.37a    | 25.99b      | 7.72a         | 26.46a       | 1032.36b      | 263.26b     |
| 6              | 6.40a    | 30.08a      | 8.08a         | 27.64a       | 1195.15a      | 418.33a     |
| 9              | 6.87a    | 30.14a      | 8.15a         | 26.99a       | 1098.94ab     | 403.75a     |
|                | *        | ***         | ns            | ns           | ***           | ***         |
| Syferkuil 2018 |          |             |               |              |               |             |
| Mulch Type     | Moisture | Chlorophyll | Stem diameter | Plant height | Shoot biomass | Grain yield |
|                | (%)      |             | (mm)          | (cm)         | (kg/ha)       | (kg/ha)     |
| C              | 5.79a    | 23.25c      | 7.93b         | 23.22b       | 249.72d       | 83.71a      |
| MLT            | 6.70a    | 26.05b      | 8.93a         | 24.44a       | 442.98b       | 66.98ab     |
| MST            | 6.84a    | 27.47a      | 8.96a         | 25.12a       | 486.88a       | 74.80a      |
| VK             | 6.83a    | 26.37b      | 8.49ab        | 25.07a       | 401.81c       | 46.52b      |
|                | ns       | ***         | *             | **           | **            | **          |
| Mulch Rate     |          |             |               |              |               |             |
| 0              | 5.79a    | 23.25c      | 7.93b         | 23.22c       | 249.72d       | 83.71a      |
| 3              | 6.84a    | 27.13a      | 8.54ab        | 23.66c       | 422.50b       | 44.21b      |
| 6              | 6.56a    | 26.31b      | 8.68a         | 25.05b       | 384.17c       | 64.87ab     |
| 9              | 6.96a    | 26.44b      | 9.16a         | 25.91a       | 525.00a       | 79.21a      |
|                | ns       | ***         | **            | ***          | ***           | ***         |

**Table S2.** Effect of mulch type and mulch rate on selected parameters at Syferkuil.

| Ofcolaco 2017        |          |             |               |              |               |             |
|----------------------|----------|-------------|---------------|--------------|---------------|-------------|
| Mulch type           | Moisture | Chlorophyll | Stem diameter | Plant height | Shoot Biomass | Grain Yield |
|                      | (%)      |             | (mm)          | (cm)         | (kg/ha)       | (kg/ha)     |
| C                    | 4.64c    | 12.26b      | 8.41b         | 31.56a       | 687.04a       | 319.06a     |
| MLT                  | 6.22ab   | 22.51a      | 11.27a        | 31.42a       | 1032.70a      | 469.48a     |
| MST                  | 6.56a    | 22.21a      | 10.90a        | 31.44a       | 1079.38a      | 505.63a     |
| VK                   | 5.75b    | 21.81a      | 10.28a        | 32.15a       | 983.02a       | 456.15a     |
|                      | **       | ns          | *             | ns           | ns            | ns          |
| Mulch Rate (tons/ha) |          |             |               |              |               |             |
| 0                    | 4.64b    | 12.26b      | 8.41b         | 31.56a       | 687.04a       | 319.06a     |
| 3                    | 6.35a    | 23.05a      | 10.76a        | 31.60a       | 1011.20a      | 445.42a     |
| 6                    | 6.00a    | 22.05a      | 10.35a        | 32.35a       | 1080.26a      | 509.79a     |
| 9                    | 6.19a    | 21.43a      | 11.35a        | 31.06a       | 1003.64a      | 476.04a     |
|                      | ns       | *           | *             | ns           | ns            | ns          |
| Ofcolaco 2018        |          |             |               |              |               |             |
| Mulch Type           | Moisture | Chlorophyll | Stem diameter | Plant height | Shoot Biomass | Grain Yield |
|                      | (%)      |             | (mm)          | (cm)         | (kg/ha)       | (kg/ha)     |

|                      |        |        |        |        |          |         |
|----------------------|--------|--------|--------|--------|----------|---------|
| C                    | 5.30c  | 16.31d | 6.33c  | 33.36c | 985.09d  | 156.86b |
| MLT                  | 6.72ab | 19.91b | 11.93a | 40.27a | 1902.07b | 273.14a |
| MST                  | 7.13a  | 21.02b | 12.40a | 40.67a | 2046.63a | 303.51a |
| VK                   | 6.35b  | 19.07c | 11.22b | 38.49b | 1593.32c | 287.60a |
|                      | **     | ***    | ***    | ***    | ***      | *       |
| Mulch Rate (tons/ha) |        |        |        |        |          |         |
| 0                    | 5.30c  | 16.31c | 6.33c  | 33.36c | 985.09d  | 156.86c |
| 3                    | 6.31b  | 20.31a | 10.82b | 39.20b | 1664.68c | 255.13b |
| 6                    | 6.71ab | 20.35a | 11.02b | 38.54b | 1747.58b | 254.58b |
| 9                    | 7.17a  | 19.34b | 13.72c | 41.70a | 2129.75a | 354.55a |
|                      | **     | ***    | ***    | ***    | ***      | ***     |
